# Supplementary material for: Planning virtual and hybrid events: steps to improve inclusion and accessibility
Source: Copernicus journal article supplement (doi:10.5194/gc-7-227-2024), 2024-10-02
Supplement: Supplementary file 1 [file gc-7-227-2024-supplement.pdf]

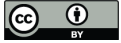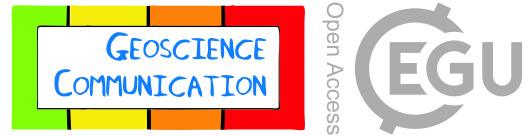

*Supplement of*

## **Planning virtual and hybrid events: steps to improve inclusion and accessibility**

**Aileen L. Doran et al.**

*Correspondence to:* Aileen L. Doran ([aileen.doran@satarla.com](mailto:aileen.doran@satarla.com))

The copyright of individual parts of the supplement might differ from the article licence.

Supplementary Material

| Article database                  | Title search string                                 | No. articles returned | URL                                                                                                                                                                                                                                             |
|-----------------------------------|-----------------------------------------------------|-----------------------|-------------------------------------------------------------------------------------------------------------------------------------------------------------------------------------------------------------------------------------------------|
| Web of Science                    | TI = (virtual NEAR/2 (conference))                  | 279                   | <a href="https://www.webofscience.com/wos/woscc/s/summary/34d65657-2bcc-4ccd-9d19fed132875b10-a09b93d9/date-descending/1">https://www.webofscience.com/wos/woscc/s/summary/34d65657-2bcc-4ccd-9d19fed132875b10-a09b93d9/date-descending/1</a>   |
| Web of Science                    | TI = (online NEAR/2 (conference))                   | 228                   | <a href="https://www.webofscience.com/wos/woscc/s/summary/14c5c961-36df-4f87-9f56-0fea450842e3-a09bc6f0/date-descending/1">https://www.webofscience.com/wos/woscc/s/summary/14c5c961-36df-4f87-9f56-0fea450842e3-a09bc6f0/date-descending/1</a> |
| Web of Science                    | TI = ((virtual NEAR/2 (conference)) AND inclusive)  | 1                     | <a href="https://www.webofscience.com/wos/woscc/s/summary/2adccb52-bb1c-4a4f-849b-7aa1341a927a-a09bff2d/date-descending/1">https://www.webofscience.com/wos/woscc/s/summary/2adccb52-bb1c-4a4f-849b-7aa1341a927a-a09bff2d/date-descending/1</a> |
| Web of Science                    | TI = ((virtual NEAR/2 (conference)) AND accessible) | 0                     | <a href="https://www.webofscience.com/wos/woscc/s/summary/5b9827b0-769e-4e76-9abd-20606eb57f03-a09c0ad4/date-descending/1">https://www.webofscience.com/wos/woscc/s/summary/5b9827b0-769e-4e76-9abd-20606eb57f03-a09c0ad4/date-descending/1</a> |
| Directory of Open Access Journals | 'virtual' AND 'conference'                          | 76                    | <a href="https://bit.ly/3YZhpvL">https://bit.ly/3YZhpvL</a>                                                                                                                                                                                     |
| Directory of Open Access Journals | 'online' AND 'conference'                           | 59                    | <a href="https://bit.ly/3R7jDY7">https://bit.ly/3R7jDY7</a>                                                                                                                                                                                     |
| Directory of Open Access Journals | 'virtual' AND 'conference' AND inclusiv*            | 1                     | <a href="https://bit.ly/3Z6qDXm">https://bit.ly/3Z6qDXm</a>                                                                                                                                                                                     |
| Directory of Open Access Journals | 'online' AND 'conference' AND inclusiv*             | 0                     | <a href="https://bit.ly/3PnaMA8">https://bit.ly/3PnaMA8</a>                                                                                                                                                                                     |
| Directory of Open Access Journals | 'virtual' AND 'conference' AND accessib*            | 0                     | <a href="https://bit.ly/3EnrCIW">https://bit.ly/3EnrCIW</a>                                                                                                                                                                                     |
| Directory of Open Access Journals | 'online' AND 'conference' AND accessib*             | 0                     | <a href="https://bit.ly/3qWSfRX">https://bit.ly/3qWSfRX</a>                                                                                                                                                                                     |

Supplementary Table S1: online article database search results used to construct the time series of published articles in Fig. 1.

| <b>Virtual conference-related search terms</b> | <b>EDI-related search terms</b> |
|------------------------------------------------|---------------------------------|
| online conference                              | alt image text                  |
| online meeting                                 | alt text                        |
| virtual conference                             | diversity                       |
| web conferencing                               | inclusivity                     |
| Zoom                                           | equity                          |
| MS Teams                                       | equidad                         |

Supplementary Table S2: google trends search terms which were aggregated to produce the graph of searches in Fig. 2.

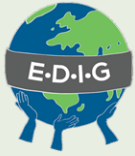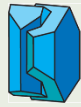

Mineralogical Society  
of the UK and Ireland

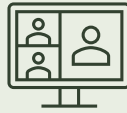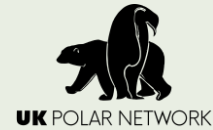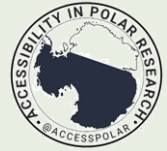

# Virtual Accessibility Checklist

This checklist is intended to act as a starting place for virtual and hybrid events, but as accessibility is an ever-evolving field, this should not be taken as a final resource. Each event is unique and will require its own accessibility needs, which need to be decided early by organisers.

For a more comprehensive review of virtual accessibility, please refer the full article ([Doran et al., 2024](#)).

## PRE-EVENT PLANNING

### GENERAL

- Ensure a diverse planning committee & decide on event logistics early (e.g., date, format, cost, platform, target audience, live/recorded talks)
- Clearly communicate to all participants information related to the event
- Identify what accessibility considerations are required for your event
- Work out what the budget is for the event. Identify possible funding for accessibility tools/features
- Design relevant event guides (e.g., accessibility statement, code of conducts) & ensure all volunteers know their roles & responsibilities
- Develop a communication strategy to advertise your event & decide on networking features implement during the event
- Set up a pre-event meeting for speakers

### ACCESSIBILITY SPECIFIC

- Decide on the platform to be used & understand the accessibility options that it offers
- Does your event need specific time zones in order to allow wider participation
- Check any clashes with other events/holidays
- Identify what communication supports are needed and feasible (e.g., captions, subtitles, transcriptions, sign language, other languages)
- Ensure advertising/graphics/etc. & your communication strategy are designed with accessibility in mind (inc. Alt Text)
- Identify and share accessibility guidelines for presenters
- Consider a pre-event questionnaire to ensure people's accessibility needs are met

## DURING THE EVENT

*'During the event' activities will need to be planned in advance for maximum impact.*

- |                                                                                                                                                           |                                                                                                                                    |
|-----------------------------------------------------------------------------------------------------------------------------------------------------------|------------------------------------------------------------------------------------------------------------------------------------|
| <input type="checkbox"/> Remind all participants of the event etiquette, code of conducts, accessibility statements & any other relevant statements/codes | <input type="checkbox"/> Explain how participants can ask questions, communicate any issues & engage with content during the event |
| <input type="checkbox"/> Ensure all volunteers know their roles & have access to all logistical details they need                                         | <input type="checkbox"/> Ensure gender neutral language is used during introductions & consider visual descriptions                |

## AFTER THE EVENT

*'After the event' activities will need to be planned in advance for maximum impact.*

- |                                                                                                                           |                                                                                                                                                                                                         |
|---------------------------------------------------------------------------------------------------------------------------|---------------------------------------------------------------------------------------------------------------------------------------------------------------------------------------------------------|
| <input type="checkbox"/> Send a follow up email/communication with details of recordings, transcriptions & other features | <input type="checkbox"/> Ensure communication channels are clearly shared for participants to get in touch with organisers/continue discussions and let people know how long they will remain available |
| <input type="checkbox"/> Request feedback to help plan future events & improve accessibility features                     | <input type="checkbox"/> Provide certificate of attendance if requested                                                                                                                                 |

Full article available, including past iterations, at: <https://doi.org/10.5194/egusphere-2023-2939>
